# Supplementary material for: RGD-modified dihydrolipoamide dehydrogenase conjugated to titanium dioxide nanoparticles –switchableintegrin-targeted photodynamic treatment of melanoma cells
Source: Royal Society of Chemistry journal article supplement (doi:10.1039/c7ra13777j), 2018-01-01
Supplement: c7ra13777j1.pdf [file c7ra13777j1.pdf]

## Supporting Information

RGD-modified dihydrolypoamide dehydrogenase conjugated to titanium dioxide nanoparticles – Switched on integrin-targeted photodynamic treatment of melanoma cells

*Avraham Dayan, Gideon Fleminger\* and Osnat Ashur-Fabian\**

\*To whom all corresponding should be made - [gidifl@post.tau.ac.il](mailto:gidifl@post.tau.ac.il), [osnataf@gmail.com](mailto:osnataf@gmail.com)

## TiO<sub>2</sub> mode of administration: Discs, nanotubes and nanoparticles

TiO<sub>2</sub> plates were prepared by heating of amorphous titanium disks (13 mm diameter), anatase for 2 h at 250°C, rutile for 5 h at 850°C. Glass disks (13 mm diameter), were covered with anatase nanotubes (A-NTs), by dipping into Titan-Shield® solution (EcoWays, Jülich, Germany) and drying for 15 min at 100°C. The anatase nanoparticles (A-NPs) were purchased from Sigma-Aldrich (St. Louise, MO). The different preparations are shown in **Figure S-1A** and were characterized by ESEM (**Figure S-1B**) and XRD (data not shown). In order to assess ROS production of the TiO<sub>2</sub> preparations, MB photodegradation assays were carried for up to 3 hrs. Optical densities of the supernatants (0.5 ml) were determined at 663. As shown in **Figure S-1C**, A-NP was the most photocatalytic form of TiO<sub>2</sub>.

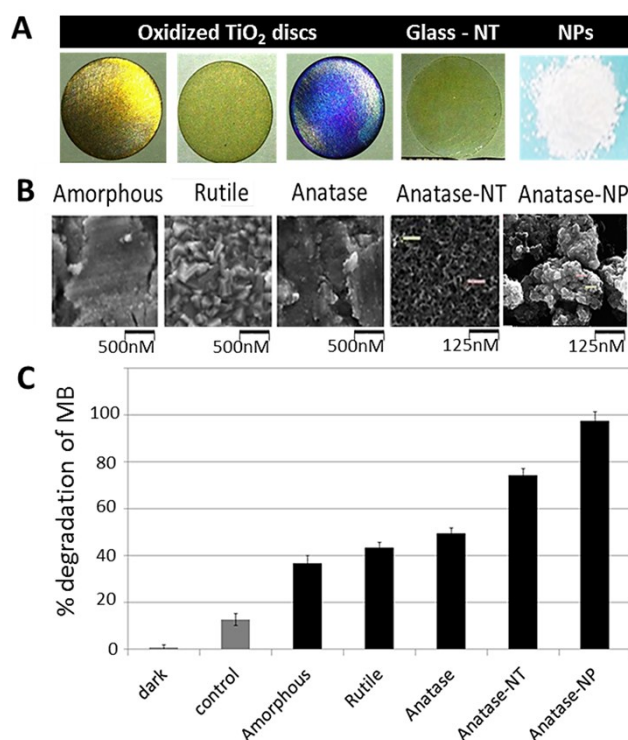

**Figure S-1: Different TiO<sub>2</sub> preparations examined for photodegradation of methylen blue.** The various TiO<sub>2</sub> preparations are shown by (A) Micrograph and (B) ESEM (C) MB photodegradation after 3h UVA (365 nm) illumination.

### ROS production by A-NPs in different media

Prior to cell assays, ROS generation by Cyt C reduction in the test tubes was measured by A-NPs suspended in different buffers (**Figure S-2**), under the same illumination condition. Similar values for ROS production are observed in the different media, including cell cultures media (DMEM) under UVA illumination. Illumination of Cyt C alone, without A-NPs, produces minute amounts of ROS (photolysis). No ROS production was observed in the dark with or without A-NPs or Cyt-C.

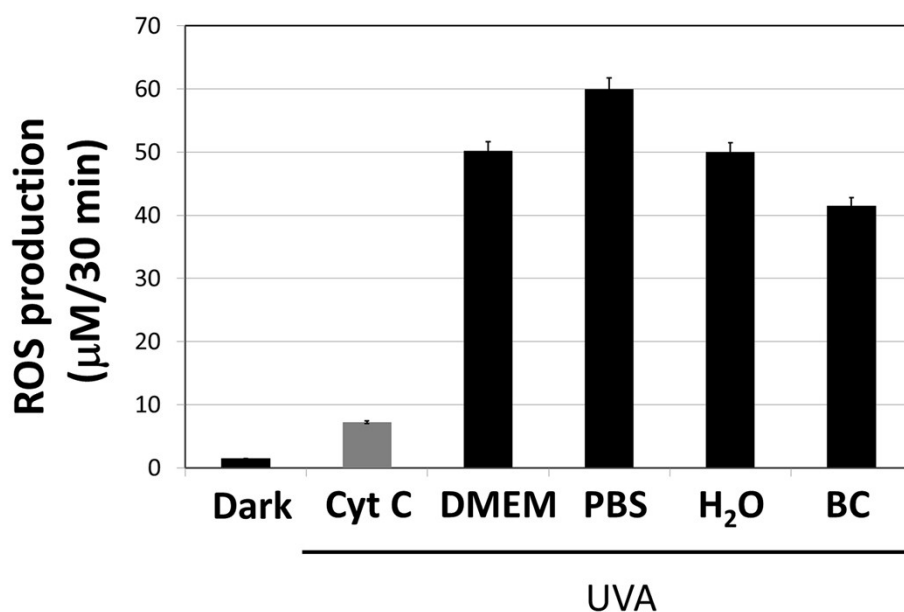

**Figure S-2: ROS production in different media.** ROS production was determined by Cyt C assay under UVA illumination (30 min) in the presence of A-NPs (black). In gray, ROS production by Cyt C in the absence of A-NPs.

### Integrin expression of cancer and normal Cells

Flow-cytometry analysis using (Figure S-3) established that mice cutaneous melanoma cells (B16F10 cells) highly express integrin  $\alpha v\beta 3$  on their surface (gray), while normal HEK293 cells lack the expression of this integrin. Isotype IgG is shown in black.

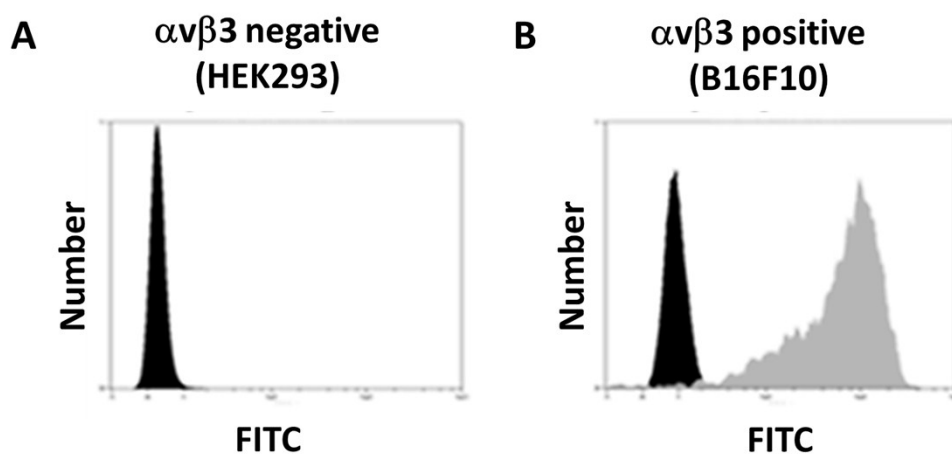

**Figure S-3:  $\alpha v\beta 3$  integrin expression on cells surface. (A) HEK293 cells. (B) B16F10 cells.**
